# Supplementary material for: Knockdown of GSG2 inhibits prostate cancer progression in vitro and in vivo
Source: PubMed Central journal article supplement — Int J Oncol. 2020 Apr 13;57(1):139–50. doi: 10.3892/ijo.2020.5043 (PMC7252458; doi:10.3892/ijo.2020.5043), 2020-04-13

Figure S1. Infection efficiency of PC-3 cells prior to injections into mice demonstrated by the expression of green fluorescent protein (magnification, x200). GSG2, germ cell-specific gene 2; shGSG2, cells transfected with GSG2-targeting short hairpin RNA; shCtrl, cells transfected with the control short hairpin RNA.

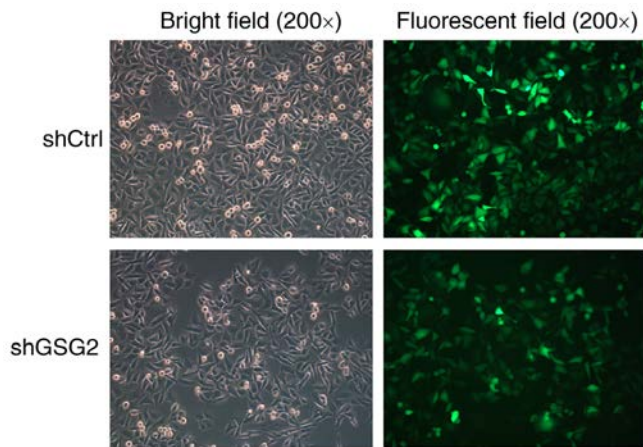

Supplement: Supplementary_Data.pdf [file Supplementary_Data.pdf]
